# Supplementary material
Source: PubMed Central journal article supplement (PMC9630728)
Supplement: sj-pdf-1-brn-10.1177_10998004221094386.pdf [file sj-pdf-1-brn-10.1177_10998004221094386.pdf]

**Table 1**

*Supplementary Data: Pattern of Relationships between SNPs and Phenotype*

|                    |            | Phenotype |                       |                |                   |                     |          |          |
|--------------------|------------|-----------|-----------------------|----------------|-------------------|---------------------|----------|----------|
| SNP                |            | Memory    | Executive Functioning | Verbal Fluency | Attention Control | Perceived Cognition | Cardiac  |          |
| Cognitive Genotype | rs101119*  | [Red]     | [Yellow]              | [Orange]       | NS                | NS                  | ND       |          |
|                    | rs1800497* |           | [Orange]              | [Grey]         | NS                | [Orange]            | [Yellow] | ND       |
|                    | rs429358*  |           | [Orange]              | [Orange]       | [Orange]          | NS                  | NS       | ND       |
|                    | rs1487441  | NS        | NS                    | [Orange]       | NS                | NS                  | ND       |          |
|                    | rs17522122 | NS        | [Yellow]              | [Yellow]       | [Yellow]          | [Yellow]            | ND       |          |
|                    | rs3897757  | [Yellow]  | [Yellow]              | NS             | [Orange]          | NS                  | ND       |          |
|                    | rs5758605  | [Orange]  | NS                    | NS             | NS                | NS                  | ND       |          |
|                    | rs6285     | [Yellow]  | NS                    | NS             | NS                | NS                  | ND       |          |
|                    | rs6313     | [Orange]  | [Yellow]              | NS             | NS                | NS                  | ND       |          |
|                    | rs6314     | NS        | NS                    | NS             | NS                | NS                  | ND       |          |
|                    | rs7581162  | [Yellow]  | NS                    | NS             | [Yellow]          | NS                  | ND       |          |
|                    | Both       | rs1801133 | NS                    | [Orange]       | NS                | NS                  | [Orange] | [Yellow] |
| Cardiac Genotype   | rs8055236  | ND        | ND                    | ND             | ND                | ND                  | [Yellow] |          |
|                    | rs1333049  | ND        | ND                    | ND             | ND                | ND                  | NS       |          |
|                    | rs1746048  | ND        | ND                    | ND             | ND                | ND                  | NS       |          |
|                    | rs28714259 | ND        | ND                    | ND             | ND                | ND                  | NS       |          |

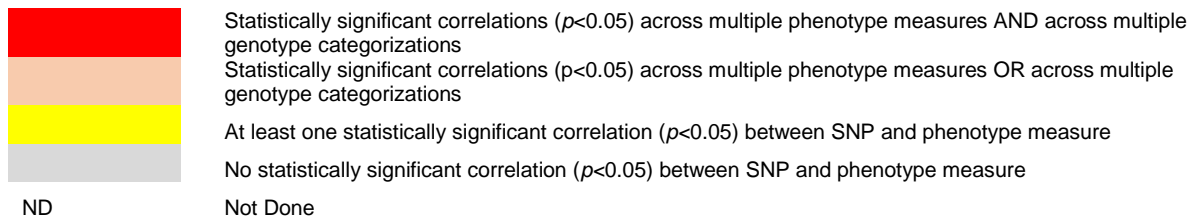

Note. \*1) Statistical significance across multiple measures within one of five cognitive domains (i.e., memory (BVMT, HVL, WMS), attention control (Digit Span, Color Trails 1), executive functioning (Stroop, Color Trails 2), verbal fluency (COWA, WTAR), and perceived cognitive performance (FACT-Cog); 2) Statistical significance across at least two of the three genetic models on the same measure; and 3) Statistical significance across multiple cognitive domains.
